# Supplementary material for: Exploring the acid-catalyzed substitution mechanism of [Fe4S4Cl4]2−
Source: Royal Society of Chemistry journal article supplement (doi:10.1039/c5dt04008f), 2015-11-20

## **Exploring the acid-catalyzed substitution mechanism of $[\text{Fe}_4\text{S}_4\text{Cl}_4]^{2-}$**

Thaer M. M. Al-Rammahi and Richard A. Henderson

**SUPPLEMENTARY INFORMATION**

## Supplementary Information

### Table of Contents

#### Kinetic Data

- FIG S1: Absorbance-time curve for the reaction of  $[\text{Fe}_4\text{S}_4\text{Cl}_4]^{2-}$  (0.2 mmol dm<sup>-3</sup>) with  $\text{PhS}^-$  (5.0 mmol dm<sup>-3</sup>) in the presence of  $\text{NHMe}_3^+$  (10.0 mmol dm<sup>-3</sup>) in MeCN at 25.0 °C.
- TABLE S1. Kinetic data for the Reaction of  $[\text{Fe}_4\text{S}_4\text{Cl}_4]^{2-}$  with PhSH in the Presence of  $\text{NHPr}^n_3^+$  in MeCN at 25.0 °C.
- TABLE S2. Kinetic data for the Reaction of  $[\text{Fe}_4\text{S}_4\text{Cl}_4]^{2-}$  with PhSH in the Presence of  $\text{NHMe}_3^+$  in MeCN at 25.0 °C.
- TABLE S3. Kinetic data for the Reaction of  $[\text{Fe}_4\text{S}_4\text{Cl}_4]^{2-}$  with PhSH in the Presence of  $\text{NHBu}^n_3^+$  in MeCN at 25.0 °C.

#### Temperature Dependence Studies

- TABLE S4. Kinetic data for the Effect of Temperature on the Reaction of  $[\text{Fe}_4\text{S}_4\text{Cl}_4]^{2-}$  (0.2 mmol dm<sup>-3</sup>) with PhSH in the Presence of  $\text{NHBu}^n_3^+$  in MeCN.
- FIG. S2. Eyring plot the Reaction of  $[\text{Fe}_4\text{S}_4\text{Cl}_4]^{2-}$  (0.2 mmol dm<sup>-3</sup>) with PhSH in the Presence of  $\text{NHBu}^n_3^+$  in MeCN
- TABLE S5. Kinetic data for the Effect of Temperature on the Reaction of  $[\text{Fe}_4\text{S}_4\text{Cl}_4]^{2-}$  (0.2 mmol dm<sup>-3</sup>) with PhSH in the Presence of  $\text{NHET}_3^+$  in MeCN at 25.0 °C.
- FIG. S3. Graphs of  $[\text{PhSH}]/k_{\text{obs}}$  versus  $[\text{NET}_3]/[\text{NHET}_3^+]$  for the Reaction of  $[\text{Fe}_4\text{S}_4\text{Cl}_4]^{2-}$  (0.2 mmol dm<sup>-3</sup>) with PhSH (2.5 mmol dm<sup>-3</sup>) in the Presence of  $\text{NHET}_3^+$  in MeCN at Various Temperatures.
- FIG. S4. Eyring plot the Reaction of  $[\text{Fe}_4\text{S}_4\text{Cl}_4]^{2-}$  (0.2 mmol dm<sup>-3</sup>) with PhSH in the Presence of  $\text{NHET}_3^+$  in MeCN: Variation of  $K_0$
- FIG. S5. Eyring plot the Reaction of  $[\text{Fe}_4\text{S}_4\text{Cl}_4]^{2-}$  (0.2 mmol dm<sup>-3</sup>) with PhSH in the Presence of  $\text{NHET}_3^+$  in MeCN: Variation of  $k$
- TABLE S6. Kinetic data for the Effect of Temperature on the Reaction of  $[\text{Fe}_4\text{S}_4(\text{SEt})_4]^{2-}$  (0.2 mmol dm<sup>-3</sup>) with PhSH in the Presence of  $\text{NHET}_3^+$  in MeCN at 25.0 °C.
- FIG. S6. Eyring plot the Reaction of  $[\text{Fe}_4\text{S}_4(\text{SEt})_4]^{2-}$  (0.2 mmol dm<sup>-3</sup>) with PhSH in the Presence of  $\text{NHET}_3^+$  in MeCN.

**FIG S1**

Absorbance-time curve for the reaction of  $[\text{Fe}_4\text{S}_4\text{Cl}_4]^{2-}$  ( $0.2 \text{ mmol dm}^{-3}$ ) with  $\text{PhS}^-$  ( $5.0 \text{ mmol dm}^{-3}$ ) in the presence of  $\text{NHMe}_3^+$  ( $10.0 \text{ mmol dm}^{-3}$ ) in MeCN at  $25.0 \text{ }^\circ\text{C}$  ( $\lambda = 550 \text{ nm}$ ). The experimental trace is shown in black and the exponential curves fit is in grey. The curve is defined by the equation  $A_t = 0.38 - (0.19e^{-13.2t}) - (0.079e^{-1.45t})$ .

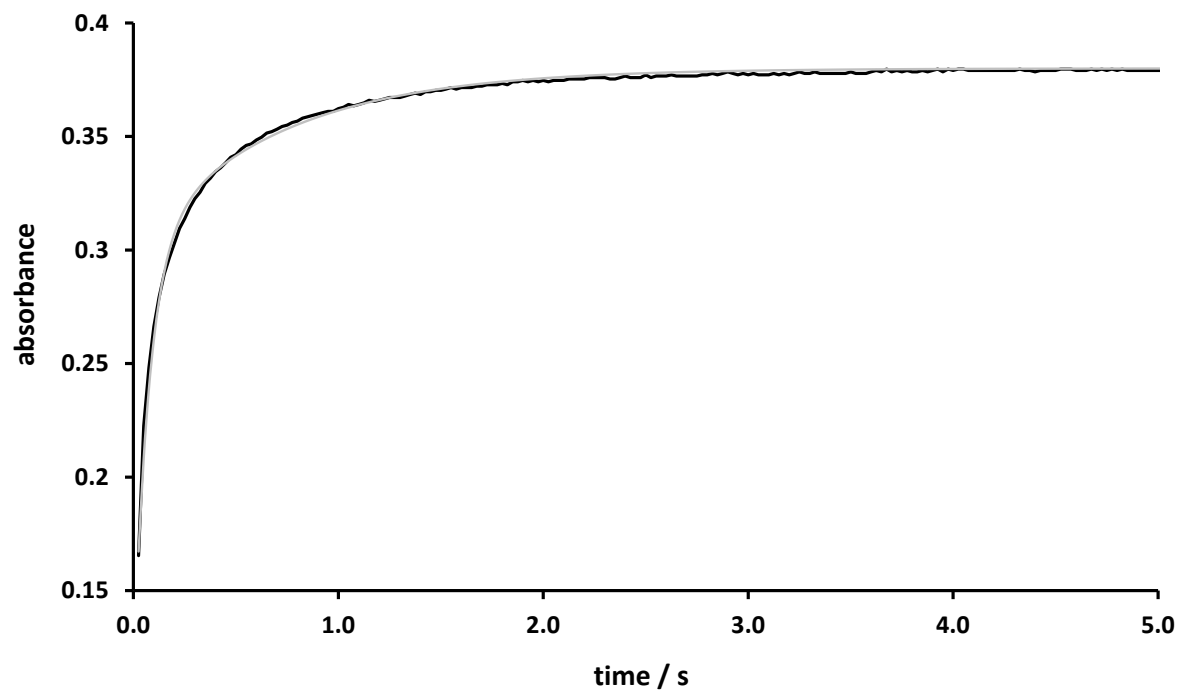

**TABLE S1**

Kinetic data for the Reaction of  $[\text{Fe}_4\text{S}_4\text{Cl}_4]^{2-}$  ( $0.2 \text{ mmol dm}^{-3}$ ) with PhSH in the Presence of  $\text{NHPr}^n_3^+$  in MeCN at  $25.0 \text{ }^\circ\text{C}$  ( $\lambda = 550 \text{ nm}$ ).

| $[\text{NHPr}^n_3^+]_i$<br>/ $\text{mmol dm}^{-3}$ | $[\text{NPr}^n]_i$<br>/ $\text{mmol dm}^{-3}$ | $[\text{PhS}^-]_i$<br>/ $\text{mmol dm}^{-3}$ | $[\text{NHPr}^n_3^+]_i/[\text{NPr}^n]_i$ | $k_{\text{obs}}(1) / \text{s}^{-1}$ | $k_{\text{obs}}(1)/[\text{PhSH}]_i$<br>/ $\text{dm}^3 \text{ mol}^{-1} \text{ s}^{-1}$ | $k_{\text{obs}}(2) / \text{s}^{-1}$ |
|----------------------------------------------------|-----------------------------------------------|-----------------------------------------------|------------------------------------------|-------------------------------------|----------------------------------------------------------------------------------------|-------------------------------------|
| 2.50                                               |                                               | 1.25                                          | 1                                        | 11.4                                | 9120                                                                                   | 2.1                                 |
| 5.00                                               |                                               | 2.50                                          | 1                                        | 27.5                                | 11000                                                                                  | 3.0                                 |
| 5.00                                               |                                               | 1.25                                          | 3                                        | 15.0                                | 12000                                                                                  | 2.6                                 |
| 10.0                                               |                                               | 2.50                                          | 3                                        | 35.0                                | 14000                                                                                  | 4.9                                 |
| 10.0                                               |                                               | 1.25                                          | 7                                        | 15.4                                | 12300                                                                                  | 2.2                                 |

**TABLE S2**

Kinetic data for the Reaction of  $[\text{Fe}_4\text{S}_4\text{Cl}_4]^{2-}$  ( $0.2 \text{ mmol dm}^{-3}$ ) with PhSH in the Presence of  $\text{NHMe}_3^+$  in MeCN at  $25.0 \text{ }^\circ\text{C}$  ( $\lambda = 550 \text{ nm}$ ).

| $[\text{NHMe}_3^+]_i$<br>/ $\text{mmol dm}^{-3}$ | $[\text{NMe}_3]_i$<br>/ $\text{mmol dm}^{-3}$ | $[\text{PhS}^-]_i$<br>/ $\text{mmol dm}^{-3}$ | $[\text{NHMe}_3^+]_e/[\text{NMe}]_e$ | $k_{\text{obs}}(1) / \text{s}^{-1}$ | $k_{\text{obs}}(1)/[\text{PhSH}]_i$<br>/ $\text{dm}^3 \text{ mol}^{-1} \text{ s}^{-1}$ | $k_{\text{obs}}(2) / \text{s}^{-1}$ |
|--------------------------------------------------|-----------------------------------------------|-----------------------------------------------|--------------------------------------|-------------------------------------|----------------------------------------------------------------------------------------|-------------------------------------|
| 2.50                                             | 0.0                                           | 1.25                                          | 1.0                                  | 2.2                                 | 1760                                                                                   | 0.37                                |
| 5.00                                             |                                               | 2.50                                          | 1.0                                  | 6.2                                 | 2480                                                                                   | 0.63                                |
| 10.0                                             |                                               | 5.00                                          | 1.0                                  | 13.2                                | 2640                                                                                   | 1.4                                 |
| 15.0                                             |                                               | 5.00                                          | 2.0                                  | 14.9                                | 2980                                                                                   | 1.0                                 |
| 5.00                                             |                                               | 1.25                                          | 3.0                                  | 3.4                                 | 2720                                                                                   | 0.76                                |
| 10.0                                             |                                               | 2.50                                          | 3.0                                  | 7.0                                 | 2784                                                                                   | 0.90                                |
| 20.0                                             |                                               | 5.00                                          | 3.0                                  | 15.6                                | 3120                                                                                   | 1.4                                 |
| 25.0                                             |                                               | 5.00                                          | 4.0                                  | 20.0                                | 4000                                                                                   | 1.5                                 |
| 15.0                                             |                                               | 2.50                                          | 5.0                                  | 12.3                                | 4920                                                                                   | 1.9                                 |
| 10.0                                             |                                               | 1.25                                          | 7.0                                  | 6.1                                 | 4880                                                                                   | 1.9                                 |
| 20.0                                             |                                               | 2.50                                          | 7.0                                  | 14.3                                | 5720                                                                                   | 1.8                                 |
| 15.0                                             |                                               | 1.25                                          | 11.0                                 | 8.9                                 | 7120                                                                                   | 1.5                                 |
| 30.0                                             |                                               | 2.50                                          | 11.0                                 | 17.5                                | 7000                                                                                   | 2.0                                 |
| 20.0                                             |                                               | 1.25                                          | 15                                   | 10.5                                | 8400                                                                                   | 1.7                                 |
| 25.0                                             |                                               | 1.25                                          | 19                                   | 12.3                                | 9800                                                                                   | 2.5                                 |

**TABLE S3**

Kinetic data for the Reaction of  $[\text{Fe}_4\text{S}_4\text{Cl}_4]^{2-}$  ( $0.2 \text{ mmol dm}^{-3}$ ) with PhSH in the Presence of  $\text{NHBu}_3^+$  in MeCN at  $25.0 \text{ }^\circ\text{C}$  ( $\lambda = 550 \text{ nm}$ ).

| $[\text{NHBu}_3^+]_i$<br>/ $\text{mmol dm}^{-3}$ | $[\text{PhS}^-]_i$<br>/ $\text{mmol dm}^{-3}$ | $[\text{NHBu}_3^+]_e/[\text{NBu}_3]_e$ | $[\text{NHBu}_3^+]_e$<br>/ $\text{mmol dm}^{-3}$ | $k_{\text{obs}}(1) / \text{s}^{-1}$ | $10^{-3}k_{\text{obs}}(1)/[\text{PhSH}]_i$<br>/ $\text{dm}^3 \text{ mol}^{-1} \text{ s}^{-1}$ | $k_{\text{obs}}(2) / \text{s}^{-1}$ |
|--------------------------------------------------|-----------------------------------------------|----------------------------------------|--------------------------------------------------|-------------------------------------|-----------------------------------------------------------------------------------------------|-------------------------------------|
| 1.25                                             | 0.625                                         | 1                                      | 0.625                                            | 1.2                                 | 1.92                                                                                          | 0.3                                 |
| 2.50                                             | 1.25                                          | 1                                      | 1.25                                             | 2.0                                 | 1.60                                                                                          | 0.41                                |
| 2.50                                             | 0.625                                         | 3                                      | 1.88                                             | 1.9                                 | 3.04                                                                                          | 0.40                                |
| 5.0                                              | 2.50                                          | 1                                      | 2.50                                             | 2.2                                 | 0.88                                                                                          | 0.44                                |
| 5.0                                              | 1.25                                          | 3                                      | 3.75                                             | 3.3                                 | 2.64                                                                                          | 0.55                                |
| 5.0                                              | 0.625                                         | 7                                      | 4.38                                             | 2.8                                 | 4.48                                                                                          | 0.50                                |
| 10.0                                             | 5.0                                           | 1                                      | 5.0                                              | 5.0                                 | 1.0                                                                                           | 0.75                                |
| 10.0                                             | 2.50                                          | 3                                      | 7.5                                              | 4.8                                 | 1.9                                                                                           | 0.70                                |
| 10.0                                             | 1.25                                          | 7                                      | 8.75                                             | 5.2                                 | 4.16                                                                                          | 0.88                                |
| 10.0                                             | 0.625                                         | 15                                     | 9.38                                             | 5.3                                 | 8.48                                                                                          | 0.90                                |
| 15.0                                             | 5.0                                           | 2                                      | 10.0                                             | 6.2                                 | 1.24                                                                                          | 0.92                                |
| 15.0                                             | 2.50                                          | 5                                      | 12.5                                             | 7.3                                 | 2.92                                                                                          | 0.95                                |
| 15.0                                             | 1.25                                          | 11                                     | 13.75                                            | 7.7                                 | 6.16                                                                                          | 0.95                                |
| 15.0                                             | 0.625                                         | 23                                     | 14.38                                            | 9                                   | 14.4                                                                                          | 1.2                                 |

## Temperature Dependence Studies

All temperature dependence studies were performed over the temperature range 15 – 35 °C.

The data was analysed using the Eyring equation shown below.

$$\log_{10}(k/T) = \{10.32 + (\Delta S^\ddagger/R)\} - \{\Delta H^\ddagger/RT\}$$

Where  $k$  = rate or equilibrium constant measured at temperature  $T$  (°K),  $R$  = gas constant and both  $\Delta H^\ddagger$  and  $\Delta S^\ddagger$  are in cal.

**TABLE S4**

Kinetic data for the Effect of Temperature on the Reaction of  $[\text{Fe}_4\text{S}_4\text{Cl}_4]^{2-}$  ( $0.2 \text{ mmol dm}^{-3}$ ) with PhSH in the Presence of  $\text{NHBu}_3^+$  in MeCN.

| Temperature / °K | $[\text{NHBu}_3^+]_i$ / $\text{mmol dm}^{-3}$ | $[\text{PhS}^-]_i$ / $\text{mmol dm}^{-3}$ | $k_{\text{obs}}(1) / \text{s}^{-1}$ | $k_{\text{obs}}(2) / \text{s}^{-1}$ |
|------------------|-----------------------------------------------|--------------------------------------------|-------------------------------------|-------------------------------------|
| 288              | 3.50                                          | 2.50                                       | 6.1                                 | 0.69                                |
|                  | 4.50                                          | 2.50                                       | 6.5                                 | 0.80                                |
|                  | 6.50                                          | 2.50                                       | 7.5                                 | 0.98                                |
|                  | 10.5                                          | 2.50                                       | 9.5                                 | 1.1                                 |
|                  | 14.5                                          | 2.50                                       | 10.5                                | 1.1                                 |
|                  |                                               |                                            |                                     |                                     |
| 293              | 3.50                                          | 2.50                                       | 6.0                                 | 0.75                                |
|                  | 4.50                                          | 2.50                                       | 6.5                                 | 1.0                                 |
|                  | 6.50                                          | 2.50                                       | 7.8                                 | 1.07                                |
|                  | 10.5                                          | 2.50                                       | 9.5                                 | 1.1                                 |
|                  | 14.5                                          | 2.50                                       | 11.3                                | 1.1                                 |
|                  |                                               |                                            |                                     |                                     |
| 308              | 3.50                                          | 2.50                                       | 6.5                                 | 0.85                                |
|                  | 4.50                                          | 2.50                                       | 7.0                                 | 1.0                                 |
|                  | 6.50                                          | 2.50                                       | 8.0                                 | 1.18                                |
|                  | 10.5                                          | 2.50                                       | 9.5                                 | 1.3                                 |
|                  | 14.5                                          | 2.50                                       | 12.2                                | 1.3                                 |



**FIG. S2**

Eyring plot the Reaction of  $[\text{Fe}_4\text{S}_4\text{Cl}_4]^{2-}$  ( $0.2 \text{ mmol dm}^{-3}$ ) with PhSH in the Presence of  $\text{NHBu}_3^+$  in MeCN.

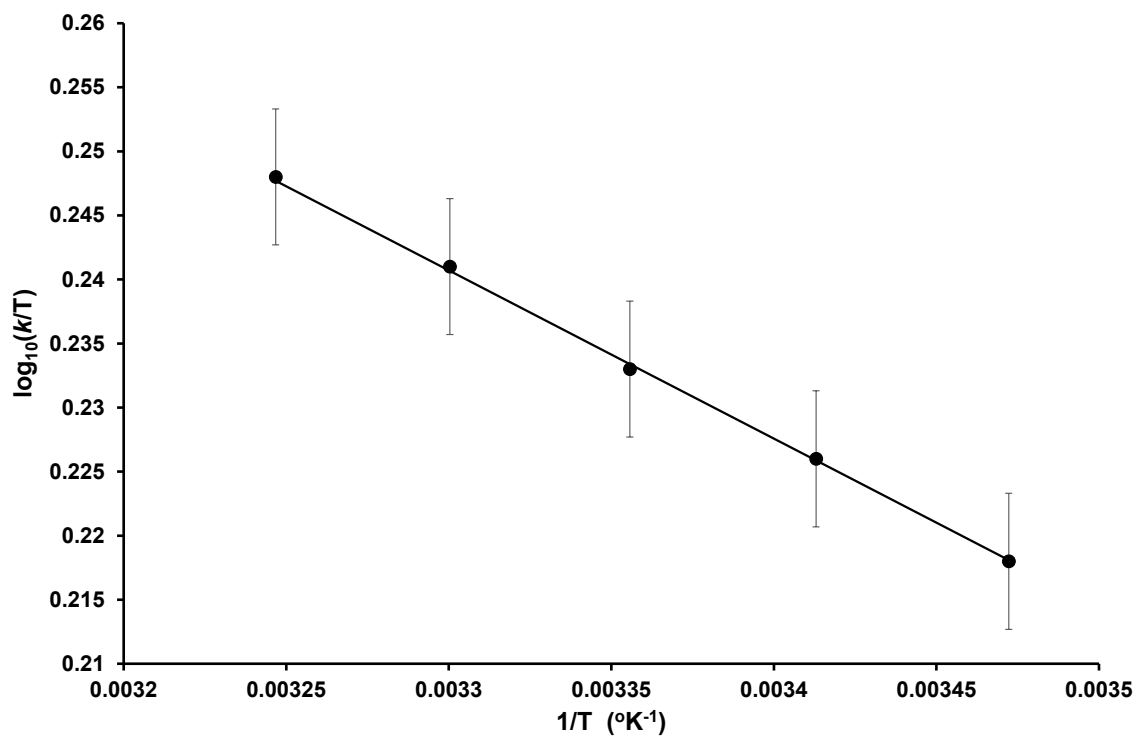

**TABLE S5**

Kinetic data for the Effect of Temperature on the Reaction of  $[\text{Fe}_4\text{S}_4\text{Cl}_4]^{2-}$  ( $0.2 \text{ mmol dm}^{-3}$ ) with PhSH in the Presence of  $\text{NHEt}_3^+$  in MeCN.

| Temperature / °K | $[\text{NHEt}_3^+]_i$ / $\text{mmol dm}^{-3}$ | $[\text{PhS}^-]_i$ / $\text{mmol dm}^{-3}$ | $[\text{NHEt}_3^+]_i/[\text{NEt}_3]_i$ | $k_{\text{obs}}(1) / \text{s}^{-1}$ | $k_{\text{obs}}(2) / \text{s}^{-1}$ |
|------------------|-----------------------------------------------|--------------------------------------------|----------------------------------------|-------------------------------------|-------------------------------------|
| 288              | 3.80                                          | 2.5                                        | 0.50                                   | 5.0                                 | 0.48                                |
|                  | 5.0                                           | 2.5                                        | 1.0                                    | 6.8                                 | 0.67                                |
|                  | 6.2                                           | 2.5                                        | 1.5                                    | 8.2                                 | 0.80                                |
|                  | 10.0                                          | 2.5                                        | 3.0                                    | 10.2                                | 0.90                                |
|                  | 15.0                                          | 2.5                                        | 5.0                                    | 11.3                                | 1.08                                |
|                  | 20.0                                          | 2.5                                        | 7.0                                    | 11.8                                | 1.2                                 |
|                  |                                               |                                            |                                        |                                     |                                     |
| 293              | 3.80                                          | 2.5                                        | 0.50                                   | 5.1                                 | 0.49                                |
|                  | 5.0                                           | 2.5                                        | 1.0                                    | 7.7                                 | 0.57                                |
|                  | 6.2                                           | 2.5                                        | 1.5                                    | 8.6                                 | 0.89                                |
|                  | 10.0                                          | 2.5                                        | 3.0                                    | 10.7                                | 1.17                                |
|                  | 15.0                                          | 2.5                                        | 5.0                                    | 11.5                                | 1.26                                |
|                  | 20.0                                          | 2.5                                        | 7.0                                    | 12.4                                | 1.55                                |
|                  |                                               |                                            |                                        |                                     |                                     |
| 303              | 3.80                                          | 2.5                                        | 0.50                                   | 5.7                                 | 0.73                                |
|                  | 5.0                                           | 2.5                                        | 1.0                                    | 8.1                                 | 0.9                                 |
|                  | 6.2                                           | 2.5                                        | 1.5                                    | 9.2                                 | 1.01                                |
|                  | 10.0                                          | 2.5                                        | 3.0                                    | 11.7                                | 1.37                                |
|                  | 15.0                                          | 2.5                                        | 5.0                                    | 13.0                                | 1.7                                 |
|                  | 20.0                                          | 2.5                                        | 7.0                                    | 14.2                                | 2.6                                 |
|                  |                                               |                                            |                                        |                                     |                                     |
| 308              | 3.80                                          | 2.5                                        | 0.50                                   | 6.0                                 | 0.83                                |
|                  | 5.0                                           | 2.5                                        | 1.0                                    | 8.3                                 | 0.96                                |
|                  | 6.2                                           | 2.5                                        | 1.5                                    | 10.0                                | 1.6                                 |
|                  | 10.0                                          | 2.5                                        | 3.0                                    | 12.6                                | 1.8                                 |
|                  | 15.0                                          | 2.5                                        | 5.0                                    | 13.9                                | 2.45                                |
|                  | 20.0                                          | 2.5                                        | 7.0                                    | 14.8                                | 3.6                                 |

FIG. S3

Graphs of  $[\text{PhSH}]/k_{\text{obs}}$  versus  $[\text{NEt}_3]/[\text{NHEt}_3^+]$  for the Reaction of  $[\text{Fe}_4\text{S}_4\text{Cl}_4]^{2-}$  ( $0.2 \text{ mmol dm}^{-3}$ ) with PhSH ( $2.5 \text{ mmol dm}^{-3}$ ) in the Presence of  $\text{NHEt}_3^+$  in MeCN at Various Temperatures. Data points correspond to:  $T = 288 \text{ }^\circ\text{K}$  ( $\blacklozenge$ );  $T = 293 \text{ }^\circ\text{K}$  ( $\blacksquare$ );  $T = 303 \text{ }^\circ\text{K}$  ( $\blacktriangle$ );  $T = 308 \text{ }^\circ\text{K}$  ( $\bullet$ ).

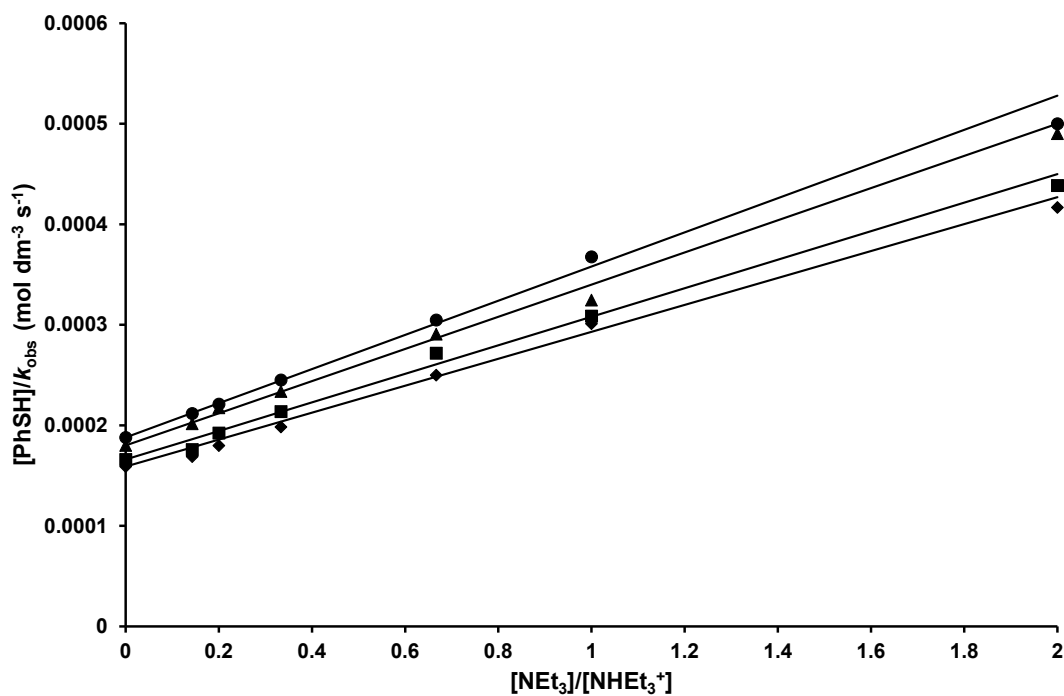

Each line is that defined by the equation below and the associated rate and equilibrium constants.

$$\frac{[\text{PhSH}]}{k_{\text{obs}}} = \frac{1}{kK_0} \frac{[\text{NEt}_3]}{[\text{NHEt}_3^+]} + \frac{1}{k}$$

| temperature / $^\circ\text{K}$ | $K_0 / \text{dm}^3 \text{ mol}^{-1}$ | $k / \text{s}^{-1}$ |
|--------------------------------|--------------------------------------|---------------------|
| 288                            | 1.103                                | $5.33 \times 10^3$  |
| 293                            | 1.124                                | $5.56 \times 10^3$  |
| 303                            | 1.168                                | $6.03 \times 10^3$  |
| 308                            | 1.190                                | $6.27 \times 10^3$  |

**FIG. S4**

Eyring plot the Reaction of  $[\text{Fe}_4\text{S}_4\text{Cl}_4]^{2-}$  ( $0.2 \text{ mmol dm}^{-3}$ ) with PhSH in the Presence of  $\text{NHEt}_3^+$  in MeCN: Variation of  $K_0$

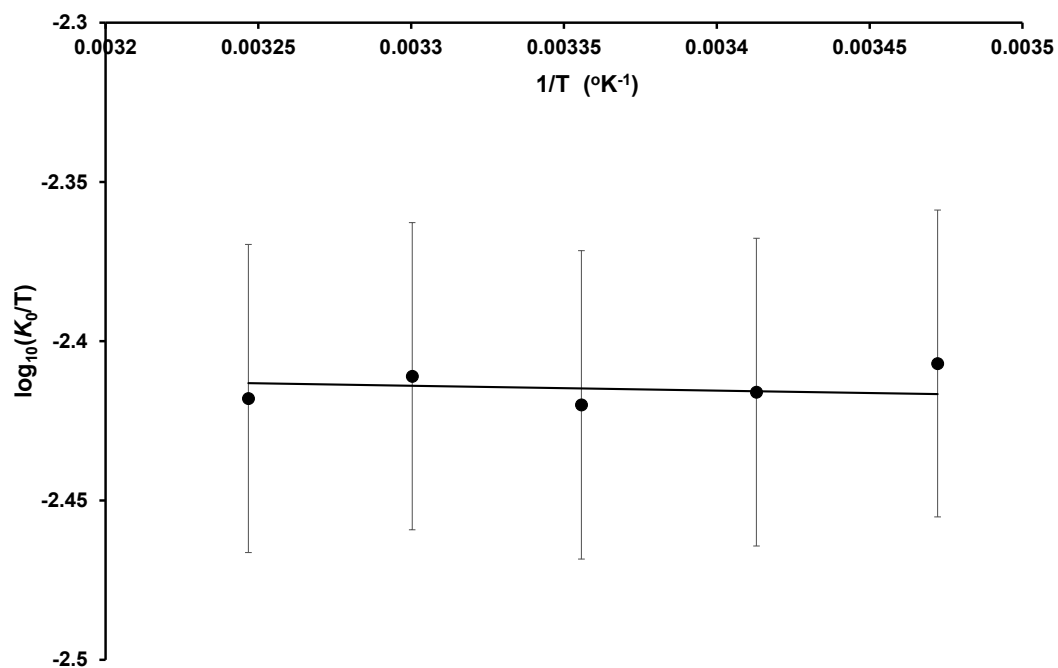**FIG. S5**

Eyring plot the Reaction of  $[\text{Fe}_4\text{S}_4\text{Cl}_4]^{2-}$  ( $0.2 \text{ mmol dm}^{-3}$ ) with PhSH in the Presence of  $\text{NHEt}_3^+$  in MeCN: Variation of  $k$

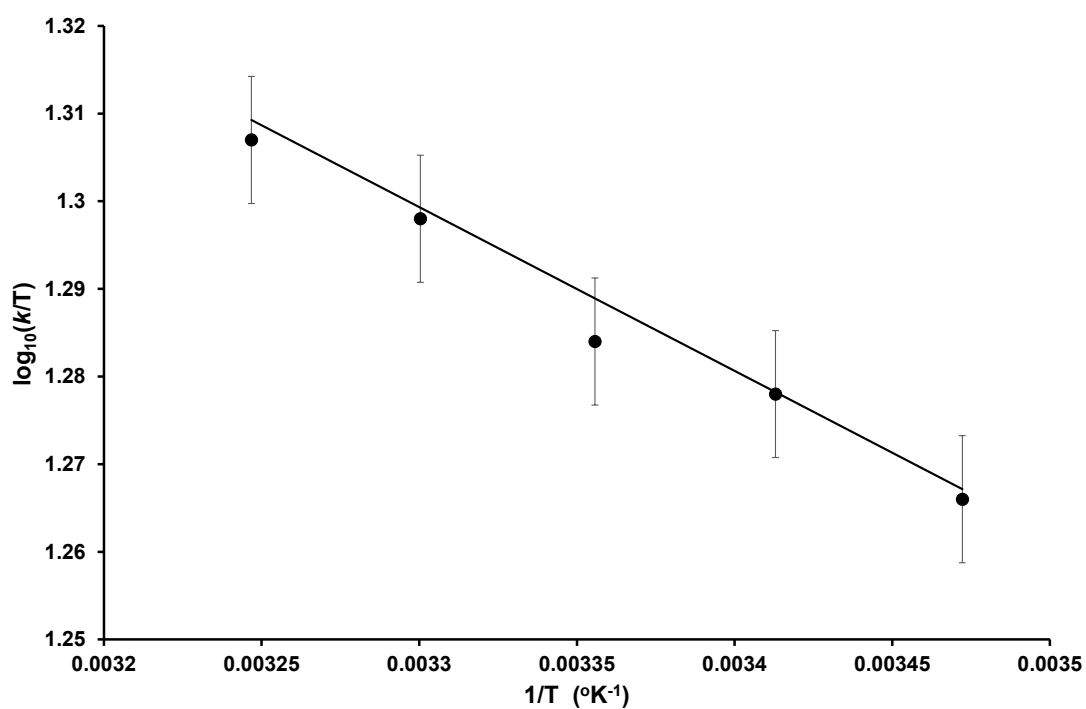

**TABLE S6**

Kinetic data for the Effect of Temperature on the Reaction of  $[\text{Fe}_4\text{S}_4(\text{SEt})_4]^{2-}$  ( $0.2 \text{ mmol dm}^{-3}$ ) with PhSH in the Presence of  $\text{NHET}_3^+$  in MeCN.

| Temperature / °K | $[\text{NHET}_3^+]_i$ / $\text{mmol dm}^{-3}$ | $[\text{PhS}^-]_i$ / $\text{mmol dm}^{-3}$ | $[\text{NHET}_3^+]_i/[\text{NET}_3]$ | $k_{\text{obs}}(1) / \text{s}^{-1}$ | $k_{\text{obs}}(2) / \text{s}^{-1}$ |
|------------------|-----------------------------------------------|--------------------------------------------|--------------------------------------|-------------------------------------|-------------------------------------|
| 288              | 10.0                                          | 1.0                                        | 9.0                                  | 1.80                                | 0.2                                 |
| 293              | 10.0                                          | 1.0                                        | 9.0                                  | 1.88                                | 0.17                                |
| 298              | 10.0                                          | 1.0                                        | 9.0                                  | 2.0                                 | 0.18                                |
| 303              | 10.0                                          | 1.0                                        | 9.0                                  | 2.1                                 | 0.2                                 |
| 308              | 10.0                                          | 1.0                                        | 9.0                                  | 2.2                                 | 0.18                                |

**FIG. S6**

Eyring plot the Reaction of  $[\text{Fe}_4\text{S}_4(\text{SEt})_4]^{2-}$  ( $0.2 \text{ mmol dm}^{-3}$ ) with PhSH in the Presence of  $\text{NHET}_3^+$  in MeCN.

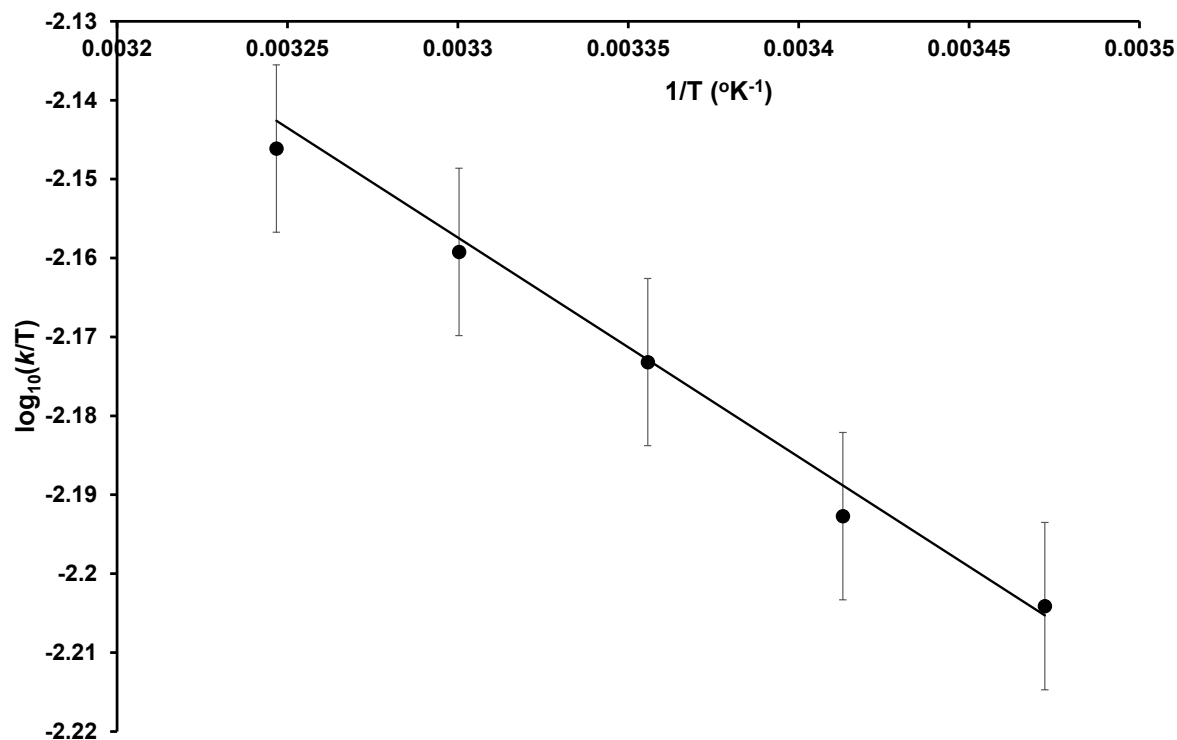

Supplement: c5dt04008f1.pdf [file c5dt04008f1.pdf]
